# Supplementary material for: PVN-mPFC OT projections modulate pup-directed pup care or attacking in virgin mandarin voles
Source: eLife. 2024 Oct 16;13:RP96543. doi: 10.7554/eLife.96543 (PMC11483125; doi:10.7554/eLife.96543)
Supplement: Figure 1—source data 1. [file elife-96543-fig1-data1.xlsx]

## Sheet: Sheet1
Figure 1-Source Data 1 for 1b,c,d,e,f,g
Sex	Group	OT(n)	c-fos(n)	merge(%)
Female	Pup care	238	282	14.29
		216	125	15.74
		154	254	11.04
		168	136	16.64
	Infanticide	250	293	8
		157	95	4.46
		182	175	7.14
		169	311	7.69
Pup care vs.Infanticide		P = 0.881	P = 0.440	P < 0.01
				Cohen's d = 3.658
Male	Pup care	179	399	16.2
		147	204	10.2
		170	74	3.53
		217	158	13.48
	Infanticide	148	77	3.38
		141	54	3.55
		229	50	4.37
		176	61	2.27
Pup care vs.Infanticide		P = 0.854	P = 0.076	P < 0.05
				Cohen's d = 1.907
OT(n)	gender * group F(1,12) = 0.000044, P = 0.995 gender main effect F(1,12) = 0.702, P = 0.418 group main effect F(1,12) = 0.060, P = 0.811
c-fos(n)	gender * group F(1,12) = 3.118, P = 0.103 gender main effect F(1,12) = 2.451, P = 0.143 group main effect F(1,12) = 1.849, P = 0.199
merge(%)	gender * group F(1,12) = 0.002, P = 0.964 gender main effect F(1,12) = 5.002, P = 0.045，η2 = 0.294 group main effect F(1,12) = 23.135, P = 0.000426, η2 = -0.658
