# Supplementary material for: PVN-mPFC OT projections modulate pup-directed pup care or attacking in virgin mandarin voles
Source: eLife. 2024 Oct 16;13:RP96543. doi: 10.7554/eLife.96543 (PMC11483125; doi:10.7554/eLife.96543)
Supplement: Figure 2—source data 1. [file elife-96543-fig2-data1.xlsx]

## Sheet: Sheet1
Figure 2-Source Data 1 for 2f, g, h, i
Sex	Treatment	Latency of approach (s)			Latency of infanticide (s)
		OFF	ON	OFF vs. ON	OFF	ON	OFF vs. ON
Female	mCherry	25.784	26.537	P = 0551	31.738	32.837	P = 0.932
		31.373	28.374		33.836	30.348
		21.284	24.389		26.274	28.759
		29.382	27.163		31.382	29.587
		26.374	23.986		28.869	26.376
		18.127	20.274		23.264	27.274
		30.829	28.173		32.318	31.857
	CHR2	23.569	42.206	P < 0.001	25.899	45.133	P < 0.001
		26.994	53.343		32.266	53.724
		25.674	38.453		34.587	45.563
		28.172	43.883		33.291	46.286
		23.538	33.433		26.657	37.969
		11.087	25.016		16.834	27.006
		26.986	42.04		30.311	44.647
mCherry vs. CHR2		P = 0.117	P < 0.01	mCherry/CHR2:η2 = 0.725 OFF/ON:η2 = 0.915 mCherry/CHR2 * OFF/ON: η2 = 0.883	P = 0.576	P < 0.01	mCherry/CHR2:η2 = 0.598 OFF/ON:η2 = 0.940 mCherry/CHR2 * OFF/ON: η2 = 0.865
Male	mCherry	47.884	42.837	P = 0.498	52.327	51.238	P = 0.500
		55.284	68.826		61.284	72.384
		73.294	69.374		82.374	75.241
		51.384	55.372		59.783	62.869
		57.277	34.384		65.457	38.492
		69.824	62.374		73.284	71.363
	CHR2	25.169	52.847	P < 0.0001	30.384	62.231	P < 0.01
		54.893	85.247		62.384	87.895
		65.314	87.384		73.834	91.374
		57.961	85.384		62.382	81.374
		52.659	78.374		63.173	82.549
		72.585	90.384		75.385	112.372
mCHerry vs. CHR2		P = 0.346	P < 0.01	mCherry/CHR2:η2 = 0.720 OFF/ON:η2 = 0.552 mCherry/CHR2 * OFF/ON: η2 = 0.892	P = 0.299	P < 0.01	mCherry/CHR2:η2 = 0.648 OFF/ON:η2 = 0.526 mCherry/CHR2 * OFF/ON: η2 = 0.859
CHR2		gender*group F(1,11) = 10.977, P = 0.007 OFF: female vs. male simple effect F(1,11) = 22.475, P = 0.001,η2 = 0.671 ON: female vs. male simple effect F(1,11) = 40.084, P = 0.000056,η2 = 0.785			gender*group F(1,11) = 9.474, P = 0.011 OFF: female vs. male simple effect F(1,11) = 24.674, P = 0.000424,η2 = 0.692 ON: female vs. male simple effect F(1,11) = 38.322, P = 0.000068,η2 = 0.777
Figure 2-Source Data 1 for 2d
CHR2+OT-	15	19	20
CHR2+OT+	149	153	166
Figure 2-Source Data 1 for 2j, o
Sex	Treatment	Latency of approach (s)
		OFF	ON	OFF vs. ON
Female	mCherry	26.849	16.384	P = 0.482
		12.428	22.385
		13.384	14.284
		11.384	26.219
		18.384	8.321
		8.384	20.384
		10.382	13.483
	CHR2	13.737	10.134	P = 0.892
		23.455	26.798
		7.505	10.159
		12.564	11.954
		8.311	11.029
		20.327	15.175
		6.769	8.687
mCHerry vs. CHR2		P = 0.753	P = 0.143
Male	mCherry	75.728	68.362	P = 0.829
		32.694	41.473
		46.847	32.738
		54.748	61.483
		27.472	26.782
		47.483	55.372
		48.482	39.836
		64.987	78.743
	CHR2	89.959	8.515	P < 0.05
		64.07	6.726
		10.401	2.46
		4.819	3.229
		10.721	3.197
		31.347	10.708
		93.953	26.285
		86.269	17.948
mCHerry vs. CHR2		P = 0.945	P < 0.001	mCherry/CHR2:η2 = 0.529 OFF/ON:η2 = 0.592 mCherry/CHR2 * OFF/ON: η2 = 0.604
CHR2		gender*group F(1,13) = 9.858, P = 0.008 OFF: female vs. male simple effect F(1,13) = 5.735, P = 0.032,η2 = 0.306 ON: female vs. male simple effect F(1,13) = 0.838, P = 0.377,η2 = 0.061
Figure 2-Source Data 1 for 2k, p
Sex	Treatment	Latency of retrieve (s)
		OFF	ON	OFF vs. ON
Female	mCherry	30.843	19.648	P = 0.784
		27.848	30.173
		18.947	19.729
		20.891	29.285
		19.958	19.846
		27.837	28.784
		19.847	23.195
	CHR2	32.756	21.787	P = 0.656
		32.748	32.758
		14.023	18.064
		26.472	26.758
		24.857	27.473
		31.784	36.683
		18.486	24.758
mCHerry vs. CHR2		P = 0.200	P = 0.152
Male	mCherry	127.648	119.537	P = 0.641
		67.397	72.784
		47.573	45.284
		146.386	138.473
		58.386	63.753
	CHR2	72.662	8.95	P < 0.05
		132.834	8.073
		154.536	86.439
		38.578	13.602
		63.824	21.356
mCHerry vs. CHR2		P = 0.942	P = 0.110	mCherry/CHR2:η2 = 0.820 OFF/ON:η2 = 0.156 mCherry/CHR2 * OFF/ON: η2 = 0.743
CHR2		gender*group F(1,10) = 21.45, P = 0.001 OFF: female vs. male simple effect F(1,10) = 13.040, P = 0.005,η2 = 0.566 ON: female vs. male simple effect F(1,10) = 0.004, P = 0.952
Figure 2-Source Data 1 for 2l, q
Sex	Treatment	Time of grooming (s)
		OFF	ON	OFF vs. ON
Female	mCherry	183.294	132.859	P = 0.117
		163.834	121.273
		142.834	98.375
		128.837	116.836
		115.783	128.837
		65.835	64.274
		74.284	82.384
	CHR2	171.141	129.016	P = 0.459
		2.264	12.105
		175.416	129.181
		143.475	135.374
		124.752	136.352
		86.483	97.437
		95.364	105.356
mCHerry vs. CHR2		P = 0.688	P = 1.000
Male	mCherry	118.473	108.739	P = 0.884
		139.584	142.382
		23.857	27.728
		14.846	23.783
		110.784	107.383
		68.631	72.829
		146.785	138.936
		138.836	142.837
	CHR2	141.233	47.823	P = 0.101
		120.022	23.811
		4.454	14.107
		121.99	63.564
		18.778	61.507
		147.665	76.987
		153.455	115.959
		72.744	91.645
mCHerry vs. CHR2		P = 0.925	P = 0.085
CHR2		gender*group F(1,13) = 1.577, P = 0.231 gender main effect F(1,13) = 1.692, P = 0.115 group main effect F(1,13) = 3.809, P = 0.073,η2 = 0.227
Figure 2-Source Data 1 for 2m, r
Sex	Treatment	Time of sniff (s)
		OFF	ON	OFF vs. ON
Female	mCherry	15.845	16.375	P = 0.767
		20.836	17.937
		10.384	6.738
		12.837	21.836
		8.726	10.826
		13.826	10.728
		19.272	20.927
	CHR2	13.536	15	P = 0.784
		15.495	21.434
		11.713	7.015
		14.375	17.385
		8.542	7.468
		10.485	12.352
		21.573	17.927
mCHerry vs. CHR2		P = 0.459	P = 0.410
Male	mCherry	15.857	21.385	P = 0.672
		20.385	13.836
		15.384	16.837
		23.947	26.847
		31.837	28.384
		13.847	16.973
		15.378	13.937
		26.836	30.384
	CHR2	23.95	21.727	P = 0.439
		16.141	13.808
		24.382	13.731
		29.903	28.776
		18.853	22.634
		11.868	16.15
		28.079	28.72
		10.159	6.906
mCHerry vs. CHR2		P = 0.997	P = 0.607
CHR2		gender*group F(1,13) = 0.635, P = 0.440 gender main effect F(1,13) = 3.470, P = 0.085 group main effect F(1,13) = 0.184, P = 0.675
Figure 2-Source Data 1 for 2n, s
Sex	Treatment	Time of crouch (s)
		OFF	ON	OFF vs. ON
Female	mCherry	78.836	69.836	P = 0.745
		92.736	89.275
		47.283	62.374
		123.365	136.274
		120.725	104.274
		74.274	93.485
		89.273	83.374
	CHR2	35.819	92.086	P = 0.115
		125.432	142.574
		23.861	39.505
		114.935	122.689
		102.382	97.353
		68.438	78.329
		75.284	72.894
mCHerry vs. CHR2		P = 0.235	P = 0.930
Male	mCherry	138.738	129.475	P = 0.656
		26.836	32.848
		14.894	23.721
		237.828	251.375
		227.847	231.485
		118.837	107.385
		12.847	23.837
		62.447	53.385
	CHR2	5.021	153.769	P < 0.001
		149.677	419.083
		0	151.373
		240.495	434.832
		122.693	314.826
		240.191	427.734
		0	187.816
		74.534	121.657
mCHerry vs. CHR2		P = 0.977	P < 0.01	mCherry/CHR2:η2 = 0.882 OFF/ON:η2 = 0.419 mCherry/CHR2 * OFF/ON: η2 = 0.907
CHR2		gender*group F(1,13) = 40.547, P = 0.000025,η2 = 0.757 OFF: female vs. male simple effect F(1,13) = 0.407, P = 0.535 ON: female vs. male simple effect F(1,13) = 11.833, P = 0.004,η2 = 0.477
