# Supplementary material for: PVN-mPFC OT projections modulate pup-directed pup care or attacking in virgin mandarin voles
Source: eLife. 2024 Oct 16;13:RP96543. doi: 10.7554/eLife.96543 (PMC11483125; doi:10.7554/eLife.96543)
Supplement: Figure 3—figure supplement 1—source data 1. [file elife-96543-fig3-figsupp1-data1.xlsx]

## Sheet: Sheet1
Figure 3-figure supplement 1-source Data 1 for fig c, f
	mCherry	CHR2
merge (%)	23.33	85
	24.53	77.27
	20.67	82.3
mCherry vs. CHR2	P < 0.0001, d = 18.893
	mCherry	eNpHR
merge (%)	23.33	8
	24.62	7.3
	28.51	4.67
mCherry vs. eNpHR	P < 0.01, d = 8.276
