# Supplementary material for: PVN-mPFC OT projections modulate pup-directed pup care or attacking in virgin mandarin voles
Source: eLife. 2024 Oct 16;13:RP96543. doi: 10.7554/eLife.96543 (PMC11483125; doi:10.7554/eLife.96543)
Supplement: Figure 3—source data 1. [file elife-96543-fig3-data1.xlsx]

## Sheet: Sheet1
Figure 3-Source Data 1 for 3d
eNpHR+OT- (n)	12	17	18
eNpHR+OT+ (n)	146	156	140
Figure 3-Source Data 1 for 3f, g, h, i
Sex	Treatment	Latency of approach (s)			Latency of infanticide (s)
		OFF	ON	OFF vs. ON	OFF	ON	OFF vs. ON
Female	mCherry	31.872	28.384	P = 0.106	36.83	33.328	P = 0.065
		26.273	21.34		30.274	25.358
		21.872	17.373		25.873	21.337
		35.748	28.742		38.271	37.276
		21.738	19.248		24.132	24.474
		21.232	25.284		27.298	27.37
	eNpHR	29.723	12.025	P < 0.0001	32.374	15.824	P < 0.0001
		31.489	11.093		33.358	15.33
		25.957	5.907		28.74	8.348
		26.119	6.764		30.372	9.24
		28.104	9.815		33.475	13.486
		27.331	6.182		35.375	10.389
mCHerry vs. eNpHR		P = 0.550	P < 0.01	mCherry/eNpHR2:η2 = 0.644 OFF/ON:η2 = 0.980 mCherry/eNpHR * OFF/ON: η2 = 0.942	P = 0.539	P < 0.01	mCherry/eNpHR:η2 = 0.607 OFF/ON:η2 = 0.991 mCherry/eNpHR * OFF/ON: η2 = 0.945
Male	mCherry	53.227	48.284	P = 0.843	57.223	53.284	P = 0.766
		45.284	54.28		47.44	57.385
		43.28	57.382		46.38	60.274
		58.283	50.384		63.826	52.48
		63.483	58.228		68.378	63.374
		79.348	69.286		84.278	72.348
	eNpHR	61.128	5.966	P < 0.05	64.738	9.382	P < 0.01
		11.459	7.095		29.38	12.43
		91.32	18.502		67.868	21.473
		46.062	16.503		49.378	18.372
		20.602	12.624		48.757	14.327
		57.378	14.835		62.559	16.376
mCHerry vs. eNpHR		P = 0.528	P < 0.0001	mCherry/eNpHR:η2 = 0.710 OFF/ON:η2 = 0.690 mCherry/eNpHR * OFF/ON: η2 = 0.608	P = 0.350	P < 0.0001	mCherry/eNpHR:η2 = 0.865 OFF/ON:η2 = 0.837 mCherry/eNpHR * OFF/ON: η2 = 0.871
eNpHR		gender*group F(1,10) = 2.111, P = 0.177 gender main effect F(1,10) = 3.256, P = 0.101 group main effect F(1,10) = 25.114, P = 0.001,η2 = 0.715			gender*group F(1,10) = 10.102, P = 0.010,η2 = 0.503 OFF: female vs. male simple effect F(1,10) = 13.031, P = 0.005,η2 = 0.566 ON: female vs. male simple effect F(1,10) = 2.252, P = 0.164,η2 = 0.184
Figure 3-Source Data 1 for3j, o
Sex	Treatment	Latency of approach (s)
		OFF	ON	OFF vs. ON
Female	mCherry	22.857	19.472	P = 0.154
		25.275	28.45
		18.388	20.384
		20.438	26.318
		23.449	28.379
		21.485	22.48
	eNpHR	15.213	22.995	P = 0.260
		27.678	20.712
		12.985	18.704
		13.142	14.337
		20.866	26.157
		26.859	30.164
mCHerry vs. eNpHR		P = 0.301	P = 0.511
Male	mCherry	43.228	45.274	P = 0.430
		42.826	38.869
		39.274	36.247
		26.274	32.637
		62.484	55.637
		67.284	62.274
	eNpHR	49.365	45.524	P = 0.449
		38.045	39.824
		52.693	49.773
		39.596	42.483
		43.397	41.274
		50.807	49.649
mCHerry vs. eNpHR		P = 0.841	P = 0.934
eNpHR		gender*group F(1,10) = 2.262, P = 0.164 gender main effect F(1,10) = 62.131, P = 0.000013,η2 = 0.861 group main effect F(1,10) = 0.576, P = 0.465
Figure 3-Source Data 1 for3k, p
Sex	Treatment	Latency of retrieve (s)
		OFF	ON	OFF vs. ON
Female	mCherry	27.173	22.884	P = 0.712
		33.189	32.642
		20.22	24.853
		23.182	30.189
		28.118	33.737
		32.123	25.188
	eNpHR	22.848	25.182	P = 0.793
		31.45	25.189
		19.483	25.298
		25.429	21.782
		26.176	29.172
		31.351	33.18
mCHerry vs. eNpHR		P = 0.224	P = 0.224
Male	mCherry	56.184	61.437	P = 0.235
		68.195	62.494
		58.218	55.189
		38.718	39.483
		78.296	59.294
		75.284	69.831
	eNpHR	65.487	58.284	P = 0.072
		58.734	62.893
		76.595	64.224
		57.728	52.392
		70.872	58.184
		75.847	73.629
mCHerry vs. eNpHR		P = 0.366	P = 0.211
eNpHR		gender*group F(1,10) = 4.067, P = 0.071 gender main effect F(1,10) = 137.393, P ＜ 0.0001,η2 = 0.932 group main effect F(1,10) = 2.881, P = 0.120
Figure 3-Source Data 1 for3l, q
Sex	Treatment	Time of grooming (s)
		OFF	ON	OFF vs. ON
Female	mCherry	120.379	86.434	P = 0.676
		95.297	104.38
		107.483	121.348
		128.388	105.28
		86.374	82.885
		106.266	121.48
	eNpHR	132.601	126.245	P = 0.520
		102.953	123.277
		98.943	90.283
		128.134	104.711
		107.136	110.315
		98.374	88.337
mCHerry vs. eNpHR		P = 0.961	P = 0.787
Male	mCherry	135.374	149.273	P = 0.254
		148.372	122.478
		142.837	128.217
		108.373	116.372
		153.271	138.391
		158.373	142.857
	eNpHR	143.138	148.382	P = 0.881
		108.336	109.142
		183.896	173.141
		153.067	159.827
		160.886	138.274
		133.248	148.559
mCHerry vs. eNpHR		P = 0.685	P = 0.245
eNpHR		gender*group F(1,10) = 0.161, P = 0.697 gender main effect F(1,10) = 11.870, P = 0.006,η2 = 0.543 group main effect F(1,10) = 0.378, P = 0.553
Figure 3-Source Data 1 for3m, r
Sex	Treatment	Time of sniff (s)
		OFF	ON	OFF vs. ON
Female	mCherry	23.482	18.273	P = 0.767
		15.223	23.482
		26.21	21.223
		23.582	26.217
		21.837	14.32
		17.231	19.388
	eNpHR	15.745	15.366	P = 0.461
		24.528	23.657
		30.49	23.749
		29.954	26.485
		27.842	13.452
		12.774	22.847
mCHerry vs. eNpHR		P = 0.445	P = 0.658
Male	mCherry	16.385	17.38	P = 0.092
		19.384	16.294
		23.58	20.681
		13.8	14.289
		25.281	22.382
		19.639	17.7
	eNpHR	18.02	21.064	P = 0.969
		16.386	30.854
		24.271	17.189
		27.468	24.395
		14.4	18.378
		25.687	13.399
mCHerry vs. eNpHR		P = 0.704	P = 0.443
eNpHR		gender*group F(1,10) = 0.238, P = 0.636 gender main effect F(1,10) = 0.264, P = 0.619 group main effect F(1,10) = 0.303, P = 0.594
Figure 3-Source Data 1 for3n, s
Sex	Treatment	Time of crouch (s)
		OFF	ON	OFF vs. ON
Female	mCherry	68.38	72.834	P = 0.686
		79.234	68.727
		82.452	76.73
		85.382	68.38
		69.83	79.358
		74.482	82.382
	eNpHR	99.456	68.997	P = 0.469
		68.388	84.373
		79.338	84.211
		92.637	83.45
		94.848	73.284
		72.289	78.382
mCHerry vs. eNpHR		P = 0.302	P = 0.366
Male	mCherry	96.25	89.584	P = 0.586
		109.787	96.562
		122.142	119.38
		87.57	96.236
		110.868	106.389
		77.612	84.284
	eNpHR	106.334	110.973	P = 0.368
		122.265	106.348
		93.16	87.965
		96.472	110.165
		128.348	115.37
		85.495	73.002
mCHerry vs. eNpHR		P = 0.529	P = 0.822
eNpHR		gender*group F(1,10) = 0.013, P = 0.911 gender main effect F(1,10) = 10.093, P = 0.010,η2 = 0.502 group main effect F(1,10) = 1.429, P = 0.260
