# Supplementary material for: PVN-mPFC OT projections modulate pup-directed pup care or attacking in virgin mandarin voles
Source: eLife. 2024 Oct 16;13:RP96543. doi: 10.7554/eLife.96543 (PMC11483125; doi:10.7554/eLife.96543)
Supplement: Figure 4—figure supplement 1—source data 1. [file elife-96543-fig4-figsupp1-data1.xlsx]

## Sheet: Sheet1
Figure 4-figure suoolement 1-Source Data 1 for fig i, o
Sex	Behaviors	AUC per second	Multiple comparisons
Female	Pre	-0.05603	F (5, 25) = 0.680 P = 0.643
		0.117825
		0.0082435
		0.093515
		-0.197795
		-0.05231
	Approach	-0.11572
		0.0088525
		-0.170473
		-0.29219
		-0.20158
		0.060585
	Investigate	0.0297125
		-0.24698
		-0.034622
		-0.29924
		-0.1527
		-0.1459
	Retrieve	0.11885
		-0.059012
		-0.012084
		0.093515
		-0.11113
		-0.18671
	Grooming	-0.31835
		0.119735
		-0.021274
		0.0043184
		-0.087675
		-0.493467
	Crouch	0.026965
		-0.0553875
		-0.160406
		-0.35325
		-0.087675
		0.206807
Male	Pre	-0.190795	F (2, 25) = 0.074 P = 0.996
		-0.12769
		-0.07809
		-0.182125
		-0.051655
		0.0141375
	Approach	0.0952917
		-0.0127993
		-0.16213
		-0.240755
		-0.111085
		0.0077075
	Investigate	0.13212
		-0.17372
		-0.206853
		0.27074
		-0.22968
		-0.070794
	Retrieve	0.0947769
		-0.10067
		0.12961
		-0.18653
		-0.127475
		-0.025683
	Grooming	-0.091738
		0.2938
		-0.340467
		-0.129655
		0.123592
		-0.156438
	Crouch	-0.169478
		0.270075
		-0.568175
		-0.51105
		0.572
		-0.110285
Figure 4-figure suoolement 1-Source Data 1 for fig r, u
Sex	Behaviors	AUC per second	Multiple comparisons
Female	Pre	0.043909	F (2, 10) = 0.002 P = 0.998
		-0.058535
		-0.116905
		0.120085
		-0.14595
		0.05664
	Approach	-0.18828
		-0.09252
		0.098925
		0.0963353
		0.076258
		-0.110092
	Infanticide	0.108217
		-0.063159
		-0.1162
		-0.05827
		0.014463
		-0.0099425
Male	Pre	-0.030528	F (2, 10) = 0.665 P = 0.536
		-0.226185
		-0.0391755
		-0.078665
		-0.0155865
		0.08063
	Approach	-0.0460127
		0.172492
		0.0804508
		-0.11889
		-0.0478795
		0.12522
	Infanticide	-0.10578
		0.193955
		0.0457087
		0.13237
		-0.061664
		-0.10159
