# Supplementary material for: PVN-mPFC OT projections modulate pup-directed pup care or attacking in virgin mandarin voles
Source: eLife. 2024 Oct 16;13:RP96543. doi: 10.7554/eLife.96543 (PMC11483125; doi:10.7554/eLife.96543)
Supplement: Figure 4—figure supplement 2—source data 1. [file elife-96543-fig4-figsupp2-data1.xlsx]

## Sheet: Sheet1
Figure 4-figure suoolement 2-Source Data 1 for fig c, f
Sex	Behaviors	AUC per second	Multiple comparisons
Female	Pre	-0.065755	P = 0.601
		0.281325
		-0.11024
		-0.3832
	Approach	-0.081524
		-0.066127
		0.070025
		0.17694
	Investigate	-0.144807
		-0.192637
		-0.0837933
		0.0366533
Male	Pre	-0.364075	P = 0.838
		0.17976
		-0.15732
		-0.0923
	Approach	-0.0055387
		-0.039209
		-0.35872
		-0.1409
	Investigate	-0.1734
		0.00794
		-0.0481567
		-0.0753867
