# Supplementary material for: PVN-mPFC OT projections modulate pup-directed pup care or attacking in virgin mandarin voles
Source: eLife. 2024 Oct 16;13:RP96543. doi: 10.7554/eLife.96543 (PMC11483125; doi:10.7554/eLife.96543)
Supplement: Figure 4—source data 1. [file elife-96543-fig4-data1.xlsx]

## Sheet: Sheet1
Figure 4-Source Data 1 for 4d, e
Sex	Approach	AUC per second	Multiple comparisons
Female	First	16.5726	First vs. Second, P = 0.055 First vs. Third, P < 0.05 η2 = 0.609
		4.937
		9.05164
		21.2948
		9.7721
		22.8931
		9.5574
		8.51636
	Second	10.3296
		4.76
		3.92009
		-0.5595
		3.2466
		4.5554
		6.0941
		4.27427
	Third	2.5124
		0.98021
		3.02355
		3.3609
		5.6326
		6.7979
		4.5309
		4.311
Male	First	8.91705	First vs Third, P < 0.01 η2 = 0.656
		3.48392
		3.9788
		3.66591
		2.994
		3.8303
		2.4533
		4.338
	Second	0.693
		2.502
		2.5324
		2.055
		1.996
		-0.86096
		0.42596
		3.2253
	Third	0.45916
		-0.792992
		2.6278
		0.343064
		0.44605
		-1.1094
		0.85037
		0.36074
Female & Male		gender*group F(2,28) = 3.791, P = 0.035,η2 = 0.213 First: female vs. male simple effect F(1,14) = 12.608, P = 0.003,η2 = 0.474 Second: female vs. male simple effect F(1,14) = 6.564, P = 0.023,η2 = 0.319 Third: female vs. male simple effect F(1,14) = 21.114, P = 0.000416,η2 = 0.601
Figure 4-Source Data 1 for 4l, m
Sex	Behaviors	AUC per second	Multiple comparisons
Female	Pre	0.29604	Pre vs. Approach, P < 0.01 Pre vs. Retrieve, P < 0.01 η2 = 0.865
		-0.085985
		-0.026045
		0.12236
		-0.20713
		-0.06369
		0.28313
		-0.07993
	Approach	9.8049
		3.5591
		5.33173
		8.0321
		6.2171
		11.4155
		6.7275
		5.70055
	Investigate	-0.29088
		-0.306575
		-1.0959
		-0.67364
		0.6189
		0.213967
		-0.1973
		-0.404433
	Retrieve	8.45865
		8.86013
		4.9275
		7.05927
		7.0549
		10.2452
		6.63738
		16.1511
	Grooming	1.13588
		-0.6132
		-0.383425
		-0.7209
		-0.149297
		-0.725056
		-0.229403
		0.56898
	Crouch	-0.69565
		0.037134
		-0.05379
		0.183882
		0.6204
		-0.193271
		-0.35507
		0.16288
Male	Pre	-0.2679	Pre vs. Approach, P < 0.05 Pre vs. Retrieve, P < 0.05 η2 = 0.775
		-0.38822
		0.31083
		0.30236
		-0.01532
		-0.005055
		0.4353
		-0.180595
	Approach	3.3564
		1.731
		3.0463
		2.02127
		1.812
		0.61997
		1.2432
		2.6413
	Investigate	0.044596
		-0.174845
		0.08364
		-0.85232
		0.10331
		-0.61845
		-0.6131
		0.65035
	Retrieve	5.07512
		7.1703
		6.0851
		2.57067
		2.31983
		3.425
		2.823
		1.7507
	Grooming	0.214183
		0.731433
		0.50814
		0.196706
		-0.788567
		-1.00255
		-0.86296
		1.00103
	Crouch	0.887114
		-0.286256
		-0.32514
		-0.688588
		0.6597
		0.7802
		-0.892667
		0.080305
Female & Male		gender*group F(5,70) = 13.2722, P ＜ 0.0001 Pre: female vs. male simple effect F(1,14) = 0.003, P = 0.961 Approach: female vs. male simple effect F(1,14) = 27.740, P = 0.000119,η2 = 0.665 Investigate: female vs. male simple effect F(1,14) = 0.140, P = 0.714 Retrieve: female vs. male simple effect F(1,14) = 11.695, P = 0.004,η2 = 0.455 Grooming: female vs. male simple effect F(1,14) = 0.147, P = 0.…
Figure 4-Source Data 1 for 4q, r
Sex	Behaviors	AUC per second	Multiple comparisons
Female	Pre	-0.144375	Pre vs Infanticide, P < 0.01 η2 = 0.925
		0.071015
		0.0858
		0.08566
		-0.057965
		0.121995
		-0.54095
		-0.084
	Approach	-1.3138
		-0.72425
		0.5881
		-0.118265
		-0.0596107
		0.267345
		-0.0431825
		0.6688
	Infanticide	-2.3718
		-6.71445
		-11.1259
		-6.63667
		-5.9899
		-5.12917
		-5.74023
		-4.35986
Male	Pre	-0.383565	Pre vs Infanticide, P < 0.01 η2 = 0.838
		-0.260705
		-0.137815
		-0.12946
		0.161195
		0.057105
		-0.5333
		-0.173925
	Approach	-0.501
		-0.47156
		0.38813
		-0.5962
		0.817
		-0.16376
		0.329505
		-0.0401955
	Infanticide	-4.31075
		-3.0578
		-4.12475
		-3.748
		-5.92023
		-3.26744
		-4.39035
		-3.5534
Female & Male		gender*group F(2,28) = 3.463, P = 0.045 Pre: female vs. male simple effect F(1,14) = 1.141, P = 0.303 Approach: female vs. male simple effect F(1,14) = 0.043, P = 0.838 Ifanticide: female vs. male simple effect F(1,14) = 4.354, P = 0.056
