# Supplementary material for: PVN-mPFC OT projections modulate pup-directed pup care or attacking in virgin mandarin voles
Source: eLife. 2024 Oct 16;13:RP96543. doi: 10.7554/eLife.96543 (PMC11483125; doi:10.7554/eLife.96543)
Supplement: Figure 5—figure supplement 1—source data 1. [file elife-96543-fig5-figsupp1-data1.xlsx]

## Sheet: Sheet1
Figure 5-figure supplement 1-Source Data 1 for fig b
	Number of merged cells
Bregma(mm)	Female					Male
-0.34	2	1	2	0	1	3	2	1	2	1
-0.46	9	7	10	6	5	7	4	5	5	3
-0.7	13	11	9	10	9	9	8	10	11	8
-0.58	12	12	9	9	10	9	11	7	10	8
-0.46	7	5	6	5	4	6	7	8	5	4
-0.34	2	1	2	1	2	4	2	3	2	1
sum	45	37	38	31	31	38	34	34	35	25
Figure 5-figure supplement 1-Source Data 1 for fig c
	Number of AAV11 cells
Bregma(mm)	Female					Male
-0.34	7	8	8	7	10	8	7	6	7	9
-0.46	12	11	17	13	13	15	18	13	11	16
-0.7	21	18	16	18	16	18	16	14	20	17
-0.58	18	21	17	17	15	16	19	15	16	16
-0.46	10	12	14	12	13	14	13	15	13	16
-0.34	8	11	14	16	10	17	8	11	12	11
sum	76	81	86	83	77	88	81	74	79	85
Figure 5-figure supplement 1-Source Data 1 for fig c
	Number of OT cells
Bregma(mm)	Female					Male
-0.34	32	26	28	27	27	39	27	31	27	28
-0.46	23	28	31	28	31	27	31	32	35	31
-0.7	30	37	36	36	37	26	34	35	31	36
-0.58	43	42	38	38	45	27	28	24	35	33
-0.46	34	38	36	35	32	28	26	25	26	28
-0.34	27	31	28	32	29	34	23	23	24	25
sum	189	202	197	196	201	181	169	170	178	181
