# Supplementary material for: PVN-mPFC OT projections modulate pup-directed pup care or attacking in virgin mandarin voles
Source: eLife. 2024 Oct 16;13:RP96543. doi: 10.7554/eLife.96543 (PMC11483125; doi:10.7554/eLife.96543)
Supplement: Figure 6—source data 1. [file elife-96543-fig6-data1.xlsx]

## Sheet: Sheet1
Figure 6-Source Data 1 for 6f, g, h, i
Sex	Treatment	Latency of approach (s)			Latency of infanticide (s)
		OFF	ON	OFF vs. ON	OFF	ON	OFF vs. ON
Female	mCherry	17.482	15.384	P = 0.103	19.84	17.483	P = 0.093
		26.482	27.538		28.197	29.189
		20.837	17.581		21.964	18.649
		33.583	28.69		36.284	32.98
		27.483	28.12		29.831	29.663
		33.589	30.841		34.687	33.847
	CHR2	28.48	32.484	P < 0.01	29.591	34.581	P < 0.01
		18.329	28.83		21.382	29.907
		31.492	47.483		33.95	50.978
		21.269	39.218		25.189	42.573
		37.284	49.84		39.107	51.83
		21.448	38.42		23.868	39.619
mCHerry vs. CHR2		P = 0.970	P < 0.05	mCherry/CHR2:η2 = 0.360 OFF/ON:η2 = 0.875 mCherry/CHR2 * OFF/ON: η2 = 0.857	P = 0.936	P < 0.05	mCherry/CHR2:η2 = 0.361 OFF/ON:η2 = 0.877 mCherry/CHR2 * OFF/ON: η2 = 0.872
Male	mCherry	38.284	32.186	P = 0.681	40.198	34.834	P = 0.728
		49.284	52.874		51.102	53.384
		62.483	42.482		64.638	45.868
		50.297	49.189		51.483	51.37
		26.836	28.193		28.384	30.847
		50.298	61.328		52.183	62.748
	CHR2	47.23	69.274	P < 0.001	50.121	73.284	P < 0.01
		61.382	79.274		64.868	84.21
		52.482	82.74		55.837	85.238
		48.273	73.389		50.846	77.274
		28.738	41.429		32.472	43.847
		49.282	69.289		55.283	72.18
mCHerry vs. CHR2		P = 0.634	P < 0.01	mCherry/CHR2:η2 = 0.798 OFF/ON:η2 = 0.889 mCherry/CHR2 * OFF/ON: η2 = 0.731	P = 0.321	P < 0.01	mCherry/CHR2:η2 = 0.835 OFF/ON:η2 = 0.910 mCherry/CHR2 * OFF/ON: η2 = 0.721
CHR2		gender*group F(1,10) = 6.533, P = 0.029 OFF: female vs. male simple effect F(1,10) = 16.587, P = 0.002,η2 = 0.624 ON: female vs. male simple effect F(1,10) = 18.983, P = 0.001,η2 = 0.655			gender*group F(1,10) = 6.111, P = 0.033,η2 = 0.909 OFF: female vs. male simple effect F(1,10) = 19.316, P = 0.001,η2 = 0.659 ON: female vs. male simple effect F(1,10) = 18.989, P = 0.001,η2 = 0.655
Figure 6-Source Data 1 for 6j, o
Sex	Treatment	Latency of approach (s)
		OFF	ON	OFF vs. ON
Female	mCherry	19.368	23.583	P = 0.205
		28.273	21.583
		23.447	18.483
		31.73	27.186
		28.821	25.266
		19.372	20.198
	CHR2	26.787	23.771	P = 0.525
		21.693	17.247
		19.287	29.569
		31.37	21.47
		37.892	32.164
		17.237	18.372
mCHerry vs. CHR2		P = 0.842	P = 0.714
Male	mCherry	48.238	53.28	P = 0.712
		40.242	43.238
		48.327	58.23
		52.852	62.662
		59.317	49.234
		61.374	52.271
	CHR2	57.747	23.287	P < 0.01
		43.278	26.472
		65.327	28.283
		59.24	39.274
		63.378	20.231
		48.286	39.34
mCHerry vs. CHR2		P = 0.321	P < 0.01	mCherry/CHR2:η2 = 0.934 OFF/ON:η2 = 0.760 mCherry/CHR2 * OFF/ON: η2 = 0.775
CHR2		gender*group F(1,10) = 16.161, P = 0.002,η2 = 0.618 OFF: female vs. male simple effect F(1,10) = 40.627, P = 0.000081,η2 = 0.802 ON: female vs. male simple effect F(1,10) = 1.927, P = 0.195
Figure 6 Source Data 1 for 6k, p
Sex	Treatment	Latency of retrieve (s)
		OFF	ON	OFF vs. ON
Female	mCherry	27.147	25.47	P = 0.085
		36.583	24.571
		32.187	21.472
		34.472	31.869
		33.572	29.121
		22.758	25.136
	CHR2	32.878	31.573	P = 0.532
		28.47	25.542
		26.187	36.381
		38.589	28.683
		45.387	38.83
		26.129	25.372
mCHerry vs. CHR2		P = 0.579	P = 0.142
Male	mCherry	66.27	59.268	P = 0.205
		64.227	68.23
		63.218	73.215
		71.379	48.275
		83.271	68.283
		85.274	72.117
	CHR2	69.237	26.338	P < 0.01
		56.274	33.234
		85.638	35.248
		73.217	45.242
		79.236	37.231
		64.215	47.478
mCHerry vs. CHR2		P = 0.875	P < 0.01	mCherry/CHR2:η2 = 0.768 OFF/ON:η2 = 0.907 mCherry/CHR2 * OFF/ON: η2 = 0.653
CHR2		gender*group F(1,10) = 27.841, P = 0.000359,η2 = 0.736 OFF: female vs. male simple effect F(1,10) = 51.864, P = 0.000029,η2 = 0.838 ON: female vs. male simple effect F(1,10) = 2.642, P = 0.135,η2 = 0.209
Figure 6-Source Data 1 for 6l, q
Sex	Treatment	Time of grooming (s)
		OFF	ON	OFF vs. ON
Female	mCherry	69.184	63.483	P = 0.135
		98.428	88.117
		87.427	82.197
		96.12	95.284
		79.928	85.24
		91.632	84.382
	CHR2	106.352	68.32	P = 0.830
		86.273	89.281
		82.768	104.238
		68.173	82.481
		82.249	89.389
		93.537	97.162
mCHerry vs. CHR2		P = 0.952	P = 0.312
Male	mCherry	54.342	52.473	P = 0.358
		72.873	68.237
		82.474	76.212
		64.72	72.367
		79.263	75.22
		82.374	79.215
	CHR2	83.282	76.358	P = 0.610
		75.238	79.237
		65.271	56.23
		63.138	69.757
		72.473	69.238
		69.858	70.251
mCHerry vs. CHR2		P = 0.872	P = 0.947
CHR2		gender*group F(1,10) = 0.138, P = 0.718 gender main effect F(1,10) = 16.918, P = 0.002,η2 = 0.629 group main effect F(1,10) = 0.004, P = 0.951
Figure 6-Source Data 1 for 6m, r
Sex	Treatment	Time of sniff (s)
		OFF	ON	OFF vs. ON
Female	mCherry	17.382	13.326	P = 0.311
		21.839	19.48
		13.248	18.482
		12.73	17.284
		17.284	21.86
		13.237	16.341
	CHR2	24.121	12.774	P = 0.396
		16.763	16.43
		16.237	18.428
		21.428	20.97
		19.372	14.182
		10.327	13.239
mCHerry vs. CHR2		P = 0.382	P = 0.301
Male	mCherry	9.37	12.387	P = 0.146
		15.228	12.472
		17.96	15.28
		16.869	10.82
		18.378	15.192
		16.285	15.297
	CHR2	17.236	13.382	P = 0.190
		21.31	19.226
		18.372	15.196
		12.282	16.621
		10.389	8.288
		24.29	17.86
mCHerry vs. CHR2		P = 0.583	P = 0.482
CHR2		gender*group F(1,10) = 0.005, P = 0.947 gender main effect F(1,10) = 0.145, P = 0.712 group main effect F(1,10) = 2.602, P = 0.138
Figure 6-Source Data 1 for 6n, s
Sex	Treatment	Time of crouch (s)
		OFF	ON	OFF vs. ON
Female	mCherry	76.43	82.573	P = 0.087
		86.273	90.129
		102.832	106.372
		69.173	83.284
		94.536	90.38
		92.758	100.372
	CHR2	92.482	86.362	P = 0.887
		110.832	107.472
		94.83	89.479
		75.824	77.121
		94.286	104.42
		103.482	109.273
mCHerry vs. CHR2		P = 0.140	P = 0.538
Male	mCherry	79.248	64.28	P = 0.820
		64.237	62.117
		82.743	74.886
		64.221	72.479
		55.282	86.239
		76.274	50.32
	CHR2	64.28	75.472	P = 0.621
		79.226	76.237
		83.274	63.775
		87.362	58.328
		75.758	85.283
		59.347	68.23
mCHerry vs. CHR2		P = 0.557	P = 0.631
CHR2		gender*group F(1,10) = 0.297, P = 0.598 gender main effect F(1,10) = 16.720, P = 0.002,η2 = 0.626 group main effect F(1,10) = 0.191, P = 0.671
