# Supplementary material for: PVN-mPFC OT projections modulate pup-directed pup care or attacking in virgin mandarin voles
Source: eLife. 2024 Oct 16;13:RP96543. doi: 10.7554/eLife.96543 (PMC11483125; doi:10.7554/eLife.96543)
Supplement: Figure 7—figure supplement 1—source data 1. [file elife-96543-fig7-figsupp1-data1.xlsx]

## Sheet: Sheet1
Figure 7-figure supplememt 1-Source Data 1 for fig c, e
	Pre(2s)	AUC per second	Post(2s)	AUC per second
Male	-0.0021356	-0.0010678	-14.5552	-7.2776
	-0.0028145	-0.00140725	-15.8089	-7.90445
	0.00065536	0.00032768	-19.9034	-9.9517
Pre vs. Post	P < 0.01, d = 11.721
Female	0.0071539	0.00357695	-15.3063	-7.65315
	-0.0067211	-0.00336055	-15.2679	-7.63395
	0.0078038	0.0039019	-13.3185	-6.65925
Pre vs. Post	P < 0.01, d = 12.667
