# Supplementary material for: PVN-mPFC OT projections modulate pup-directed pup care or attacking in virgin mandarin voles
Source: eLife. 2024 Oct 16;13:RP96543. doi: 10.7554/eLife.96543 (PMC11483125; doi:10.7554/eLife.96543)
Supplement: Figure 8—source data 1. — Statistical results of the number of infanticide or non-infanticide voles induced by injection of saline and OT. [file elife-96543-fig8-data1.xlsx]

## Sheet: Sheet1
Figure 8-Source Data 1 for fig8b, c, d, e
Sex	Latency of approach (s)		Latency of infanticide (s)
	Saline	OT	Saline	OT
Female	4.696	4.137	33.101	254.892
	14.756	124.811	20.004	129.145
	43.447	600	54.393	600
	161.587	600	163.242	600
	108.045	578.849	109.705	579.327
	17.909	36.97	19.611	42.793
	19.867	600	21.42	600
	6.365	19.996	8.174	25.983
Saline vs. OT	P < 0.05, d = 5.891		P < 0.01, d = 1.063
Male	20.776	49.254	22.394	600
	128.625	277.738	130.757	300.168
	50.421	16.473	54.883	20.648
	64.185	46.076	64.439	600
	12.442	0.92	13.412	1.363
	141.13	600	284.907	600
	25.317	52.712	27.142	600
Saline vs. OT	P = 0.310		P < 0.05, d = 1.345
Female & Male	gender*group F(1,13) = 2.597, P = 0.131 gender main effect F(1,13) = 0.962, P = 0.345,η2 = 0.069 group main effect F(1,13) = 9.508, P = 0.009,η2 = 0.422		gender*group F(1,13) = 0.001, P = 0.981 gender main effect F(1,13) = 0.169, P = 0.688 group main effect F(1,13) = 21.642, P = 0.000453,η2 = 0.625
Figure 8-Source Data 1 for fig8f, k
Sex	Latency of approach (s)
	Saline	OT
Female	33.746	42.364
	23.11	30.794
	37.031	9.039
	61.936	51.635
	49.089	7.857
	6.386	17.2
	1.635	0.894
Saline vs. OT	P = 0.357
Male	47.94	7.204
	6.135	1.163
	26.642	4.316
	30.228	10.634
	25.027	5.894
Saline vs. OT	P < 0.05, d = 1.335
Female & Male	gender*group F(1,10) = 1.787, P = 0.211 gender main effect F(1,10) = 1.338, P = 0.274 group main effect F(1,10) = 7.908, P = 0.018,η2 = 0.442
Figure 8-Source Data 1 for fig8g, l
Sex	Time of sniff (s)
	Saline	OT
Female	5.988	9.706
	33.066	2.07
	1.701	1.353
	12.601	9.94
	14.534	20.855
	8.799	8.569
	3.952	3
Saline vs. OT	P = 0.612
Male	10.599	1.336
	12.434	8.366
	15.628	14.272
	12.379	14.719
	8.482	6.361
Saline vs. OT	P = 0.203
Female & Male	gender*group F(1,10) = 0.014, P = 0.908 gender main effect F(1,10) = 0.053, P = 0.823 group main effect F(1,10) = 1.221, P = 0.295
Figure 8-Source Data 1 for fig8h, m
Sex	Latency of retrieve (s)
	Saline	OT
Female	27.243	33.278
	66.35	30.311
	9.15	21.315
	2.675	2.785
Saline vs. OT	P = 0.710
Male	58.435	14.749
	13.812	6.043
	35.374	9.485
	43.281	19.428
	33.683	13.628
Saline vs. OT	P < 0.05, d = 2.04
Female & Male	gender*group F(1,7) = 2.945, P = 0.130 gender main effect F(1,7) = 0.004, P = 0.950 group main effect F(1,7) = 6.169, P = 0.042,η2 = 0.468
Figure 8-Source Data 1 for fig8i, n
Sex	Time of grooming (s)
	Saline	OT
Female	18.598	13.25
	11.419	11.515
	111.864	131.754
	117.631	23.275
	221.603	138.069
	127.816	153.174
	98.362	90.657
Saline vs. OT	P = 0.298
Male	32.35	33.71
	70.977	23.711
	24.742	26.483
	35.385	28.637
	23.682	32.463
Saline vs. OT	P = 0.448
Female & Male	gender*group F(1,10) = 0.279, P = 0.609 gender main effect F(1,10) = 4.013, P = 0.073 group main effect F(1,10) = 1.558, P = 0.240
Figure 8-Source Data 1 for fig8j, o
Sex	Time of crouch (s)
	Saline	OT
Female	462.574	395.53
	272.669	333.355
	136.748	178.159
	0	51.232
	305.81	245.626
	383.933	500.08
	153.583	150.387
Saline vs. OT	P = 0.462
Male	397.75	508.163
	45.169	374.63
	231.46	254.738
	305.264	276.735
	275.384	258.463
Saline vs. OT	P = 0.275
Female & Male	gender*group F(1,10) = 1.034, P = 0.333 gender main effect F(1,10) = 0.236, P = 0.637 group main effect F(1,10) = 2.727, P = 0.130
Figure 8-Source Data 1 for fig8p, q
Sex	Number of voles (n)				Saline vs. OT
	Saline		OT
	Infanticide	Not infanticide	Infanticide	Not infanticide
Female	26	21	6	16	P < 0.05, OR = 0.303
Male	15	19	3	13	P = 0.081, OR = 0.292
