# Supplementary material for: PVN-mPFC OT projections modulate pup-directed pup care or attacking in virgin mandarin voles
Source: eLife. 2024 Oct 16;13:RP96543. doi: 10.7554/eLife.96543 (PMC11483125; doi:10.7554/eLife.96543)
Supplement: Figure 10—source data 1. [file elife-96543-fig10-data1.xlsx]

## Sheet: Sheet1
Figure 10-Source Data 1 for fig10a, b
activation of PVN				inhibition of PVN
Total distance of female		Total distance of male		Total distance of female		Total distance of male
OFF	ON	OFF	ON	OFF	ON	OFF	ON
808.65	1184.75	883.33	638.14	1001.9	1020.59	933.35	888.27
2267.88	2819.99	1188.67	1036.87	784.3	808.32	1247.54	1370.61
784.92	632.51	1868.06	2011.27	1335.33	1384.42	1126.34	1206.68
704.7	859.71	1939.76	1758.93	1114.47	1007.52	1031.77	932.01
1497.31	1503.34	615.12	829.4	596.41	570.32	728.34	804.07
P = 0.2115		P = 0.6600		P = 0.7791		P = 0.5596
Figure 10-Source Data 1 for fig10c, d
activation of PVN-mPFC				inhibition of PVN-mPFC
Total distance of female		Total distance of male		Total distance of female		Total distance of male
OFF	ON	OFF	ON	OFF	ON	OFF	ON
833.62	728.74	901.2	985.61	913.21	1039.4	560.49	969.82
787.98	826.78	810.28	939.45	845.7	931.3	895.76	743.32
854.31	909.21	905.56	960.64	826.61	907.05	877.05	656.95
816	918.68	739.25	704.65	970.24	837.3	1270.69	1337.99
944.4	1006.72	1024.03	963.36	659.26	664.87	775.62	650.55
P = 0.4351		P = 0.3882		P = 0.5115		P = 0.9724
